# Supplementary material for: Ramadan Fasting in Kidney Transplant Recipients: A Single-Centre Retrospective Study
Source: Hindawi journal article supplement (doi:10.1155/2018/4890978), 2018-06-03
Supplement: f1 [file 4890978.f1.pdf]

**Table (S1): Comparing changes in biochemical and metabolic parameters between pre-Ramadan (baseline) and during Ramadan in fasting and non-fasting groups<sup>a,b</sup>**

| Parameter                 |                             | Pre-Ramadan | During Ramadan | Δ pre – during (p value <sup>§</sup> ) |
|---------------------------|-----------------------------|-------------|----------------|----------------------------------------|
| Na (mmol/l)               | <i>F</i>                    | 141.6±3.5   | 140.2±3        | 0.0001                                 |
|                           | <i>NF</i>                   | 141.7±2.9   | 140.1±2.7      | 0.0001                                 |
|                           | <i>P value</i>              | 0.75        | 0.8            | 0.454 <sup>^</sup>                     |
| K (mmol/l)                | <i>F</i>                    | 4.4±0.4     | 4.5±0.4        | 0.006                                  |
|                           | <i>NF</i>                   | 4.4±0.4     | 4.4±0.4        | 0.03                                   |
|                           | <i>P value</i>              | 0.8         | 0.5            | 0.7 <sup>^</sup>                       |
| HCO <sub>3</sub> (mmol/l) | <i>F</i>                    | 23.9±2.9    | 24.4±3.2       | 0.005                                  |
|                           | <i>NF</i>                   | 24±3        | 24.2±3         | 0.26                                   |
|                           | <i>P value</i>              | 0.6         | 0.4            | 0.2 <sup>^</sup>                       |
| Albumin (g/l)             | <i>F</i>                    | 42±3.9      | 43±3.7         | 0.0001                                 |
|                           | <i>NF</i>                   | 42±3.8      | 42.5±3.9       | 0.004                                  |
|                           | <i>P value</i> <sup>*</sup> | 0.8         | 0.2            | 0.2 <sup>^</sup>                       |
| Hb (g/l)                  | <i>F</i>                    | 137±17.5    | 137.2±16.9     | 0.75                                   |
|                           | <i>NF</i>                   | 135.5±19    | 136.2±18       | 0.12                                   |
|                           | <i>P value</i>              | 0.3         | 0.5            | 0.38 <sup>^</sup>                      |
| WBCs                      | <i>F</i>                    | 7±2         | 7.3±2.2        | 0.02                                   |
|                           | <i>NF</i>                   | 7.3±2.1     | 7.5±2.3        | 0.07                                   |
|                           | <i>P value</i>              | 0.1         | 0.2            | 0.9 <sup>^</sup>                       |
| Glucose                   | <i>F</i>                    | 6.2±2.2     | 5.9±1.8        | 0.02                                   |
|                           | <i>NF</i>                   | 6.2±2.5     | 6±1.9          | 0.06                                   |
|                           | <i>P value</i>              | 0.9         | 0.8            | 0.58 <sup>^</sup>                      |
| T. Chol                   | <i>F</i>                    | 4.2±0.8     | 4.2±0.9        | 0.0001                                 |
|                           | <i>NF</i>                   | 4.2±0.9     | 4.1±0.9        | 0.001                                  |
|                           | <i>P value</i>              | 0.6         | 0.7            | 0.53 <sup>^</sup>                      |
| HDL                       | <i>F</i>                    | 1.23±0.3    | 1.3±0.4        | 0.0001                                 |
|                           | <i>NF</i>                   | 1.2±0.35    | 1.3±0.36       | 0.0001                                 |
|                           | <i>P value</i>              | 0.9         | 0.65           | 0.56 <sup>^</sup>                      |
| LDL                       | <i>F</i>                    | 2.6±0.7     | 2.4±0.6        | 0.0001                                 |
|                           | <i>NF</i>                   | 2.6±0.7     | 2.5±0.65       | 0.0001                                 |
|                           | <i>P value</i>              | 0.9         | 0.85           | 0.43 <sup>^</sup>                      |
| TGs                       | <i>F</i>                    | 1.5±0.7     | 1.53±0.8       | 0.3                                    |
|                           | <i>NF</i>                   | 1.5±0.74    | 1.54±0.84      | 0.1                                    |
|                           | <i>P value</i>              | 0.99        | 0.9            | 0.97 <sup>^</sup>                      |

<sup>a</sup>**Abbreviations:** Na, sodium; K, potassium; HCO<sub>3</sub>, bicarbonate; Hb, hemoglobin; WBCs, white blood cells; T. Chol, total cholesterol; HDL, high-density lipoprotein; LDL, low-density lipoprotein; TGs, triglycerides; F, fasting; NF, non-fasting

<sup>b</sup>Data are presented as mean ± SD; p-value is significant if <0.05.

<sup>\*</sup>P value in-between groups

<sup>§</sup> P value within each group

<sup>^</sup>P value of the mean **percent** change of each parameter during Ramadan compared to pre-Ramadan in the fasting versus nonfasting groups

**Table (S2): Comparing changes in biochemical and metabolic parameters between pre-Ramadan (baseline) and post-Ramadan in fasting and non-fasting groups<sup>a,b</sup>**

| Parameter                 |                             | Pre-Ramadan | Post-Ramadan | Δ Pre – post (p value <sup>§</sup> ) |
|---------------------------|-----------------------------|-------------|--------------|--------------------------------------|
| Na (mmol/l)               | <i>F</i>                    | 141.6±3.5   | 139.6±3.4    | 0.0001                               |
|                           | <i>NF</i>                   | 141.7±2.9   | 139.5±3      | 0.0001                               |
|                           | <i>P value</i>              | 0.75        | 0.6          | 0.3 <sup>^</sup>                     |
| K (mmol/l)                | <i>F</i>                    | 4.4±0.4     | 4.3±0.35     | 0.008                                |
|                           | <i>NF</i>                   | 4.4±0.4     | 4.4±0.37     | 0.16                                 |
|                           | <i>P value</i>              | 0.8         | 0.47         | 0.4 <sup>^</sup>                     |
| HCO <sub>3</sub> (mmol/l) | <i>F</i>                    | 23.9±2.9    | 24±3.6       | 0.6                                  |
|                           | <i>NF</i>                   | 24±3        | 24.1±3.9     | 0.45                                 |
|                           | <i>P value</i>              | 0.6         | 0.57         | 0.8 <sup>^</sup>                     |
| Albumin (g/l)             | <i>F</i>                    | 42±3.9      | 41.4±3.9     | 0.0001                               |
|                           | <i>NF</i>                   | 42±3.8      | 41.6±4.3     | 0.033                                |
|                           | <i>P value</i> <sup>*</sup> | 0.8         | 0.6          | 0.4 <sup>^</sup>                     |
| Hb (g/l)                  | <i>F</i>                    | 137±17.5    | 137.2±18     | 0.77                                 |
|                           | <i>NF</i>                   | 135.5±19    | 136.2±20     | 0.2                                  |
|                           | <i>P value</i>              | 0.3         | 0.54         | 0.47 <sup>^</sup>                    |
| WBCs                      | <i>F</i>                    | 7±2         | 7.3±2.5      | 0.04                                 |
|                           | <i>NF</i>                   | 7.3±2.1     | 7.6±2.6      | 0.02                                 |
|                           | <i>P value</i>              | 0.1         | 0.16         | 0.8 <sup>^</sup>                     |
| Glucose                   | <i>F</i>                    | 6.2±2.2     | 6.3±2.3      | 0.37                                 |
|                           | <i>NF</i>                   | 6.2±2.5     | 6.3±2.5      | 0.2                                  |
|                           | <i>P value</i>              | 0.9         | 0.9          | 0.78 <sup>^</sup>                    |
| T. Chol                   | <i>F</i>                    | 4.2±0.8     | 4.4±0.95     | 0.0001                               |
|                           | <i>NF</i>                   | 4.2±0.9     | 4.3±1        | 0.0001                               |
|                           | <i>P value</i>              | 0.6         | 0.35         | 0.5 <sup>^</sup>                     |
| HDL                       | <i>F</i>                    | 1.23±0.3    | 1.3±0.4      | 0.0001                               |
|                           | <i>NF</i>                   | 1.2±0.35    | 1.27±0.4     | 0.0001                               |
|                           | <i>P value</i>              | 0.9         | 0.8          | 0.66 <sup>^</sup>                    |
| LDL                       | <i>F</i>                    | 2.6±0.7     | 2.6±0.7      | 0.08                                 |
|                           | <i>NF</i>                   | 2.6±0.7     | 2.6±0.7      | 0.26                                 |
|                           | <i>P value</i>              | 0.9         | 0.56         | 0.5 <sup>^</sup>                     |
| TGs                       | <i>F</i>                    | 1.5±0.7     | 1.55±0.8     | 0.06                                 |
|                           | <i>NF</i>                   | 1.5±0.74    | 1.54±0.84    | 0.2                                  |
|                           | <i>P value</i>              | 0.99        | 0.85         | 0.72 <sup>^</sup>                    |

<sup>a</sup>**Abbreviations:** Na, sodium; K, potassium; HCO<sub>3</sub>, bicarbonate; Hb, hemoglobin; WBCs, white blood cells; T. Chol, total cholesterol; HDL, high-density lipoprotein; LDL, low-density lipoprotein; TGs, triglycerides; F, fasting; NF, non-fasting

<sup>b</sup>Data are presented as mean ± SD; p-value is significant if <0.05.

<sup>\*</sup>P value in-between groups

<sup>§</sup> P value within each group

<sup>^</sup>P value of the mean **percent** change of each parameter post-Ramadan compared to pre-Ramadan in the fasting versus non-fasting groups
